# Supplementary material for: Effects of a recent volcanic eruption on the isolated population of the iconic red-billed chough in La Palma, Canary Islands
Source: PeerJ. 2024 Sep 30;12:e18071. doi: 10.7717/peerj.18071 (PMC11448657; doi:10.7717/peerj.18071)
Supplement: Supplemental Information 1 [file peerj-12-18071-s001.xlsx]

## Sheet: Hoja1
ID roost	zone	number of choughs before eruption	number of chough after.eruption	diferencce	n pairs before eruption	n pairs after eruption	Distance to the volcano	Altitude	Orientation (º)	mean altitude orography	minimum altitude orography	maximum altitude orography	sum_ash 100m	sum ash 500m	sum ash 1000m
1	North	46	65	19	5	3	23.5594	317.76	155	1197.77431070743	245.832992553711	1777.31494140625	79.0251	1809.57	8918.14
2	North	148	66	-82			22.1694	581.335	155	1266.5534930548	246.164993286133	1780.68994140625	427.992	10572.1	40604.8
3	North	180	20	-160			23.7386	80.85	150	1014.80447166047	80.8499984741211	1473.17504882812	244.716	4200.96	16259.7
4	North	154	227	73	6	6	23.4095	629.86	160	1315.60305970622	300.785003662109	2051.07495117188	0	212.993	1452.08
5	North	49	12	-37			26.4361	158.54	166	1252.96124450316	158.539993286133	2274.7099609375	0	0	0
6	North	255	84	-171			25.2002	368.49	161	1267.07808555754	317.380004882812	2092.11791992188	0	364.898	2076.02
7	North	43	50	7	17	6	26.1512	177.29	169	1254.74964685758	177.182006835938	2291.03491210938	0	0	0
8	North	127	180	53	14	9	22.8872	243.845	147	982.243915396313	160.365005493164	1305.59497070312	556.213	13839	49807.5
9	North	35	130	95	7	5	25.6272	36.833	173	1220.95748493578	36.8330001831055	2414.73510742188	0	0	0
10	North	58	0	-58			25.2134	167.28	172	1245.39796516997	167.279998779297	2395.25	0	0	0
11	North	20	0	-20			24.2271	191.595	176	1175.64516822242	123.889999389648	2338.3701171875	0	0	0
12	North	64	103	39			24.2266	209.91	178	1092.81607118878	149.285003662109	2307.90991210938	0	0	0
14	North	59	0	-59	5	3	25.8691	112.345	194	1424.26239512403	112.345001220703	2248.34008789062	0	0	0
16	Central	81	56	-25			13.6261	151.475	133	454.891952542595	151.475006103516	556.523010253906	5299.18	131652	486864
18	Central	128	22	-106			9.53424	688.78	132	455.399910573082	87.5350036621094	926.505004882812	6301.91	154485	590297
19	Central	100	8	-92			9.22808	408.93	137	492.004847811548	132.615005493164	922.27001953125	4216.95	105248	421538
21	Central	0	73	73			13.4417	1747.72	159	1103.02086854806	285.888000488281	1940.38696289062	0	0	0
22	Central	71	77	6	10	7	5.91673	646.39	163	724.270692494994	602.849975585938	925.97998046875	26044.7	651899	2.50896e+06
24	Central	84	26	-58			8.26133	1464.74	206	1748.95870452501	1435.92004394531	2047.75	8134.71	205440	823695
25	Central	257	151	-106	10	8	6.81684	1590.27	198	955.269772764856	833.5	1590.27001953125	4940.59	135022	611315
26	Central	0	45	45	9	7	12.0696	970.025	219	881.076381623082	807.609985351562	975.559997558594	3321.33	76377.7	299811
28	Central	75	135	60			11.8877	280.44	229	223.050844126734	206.210006713867	281.899993896484	2666.11	74317.8	377441
30	South	122	160	38	19	18	6.17219	1246.77	285	1413.9800608441	900.059997558594	1777.11999511719	33893.7	842615	3.38867e+06
31	South	320	278	-42	19	23	8.62325	924.055	321	1420.67857464516	896.054992675781	1868.0400390625	8296.75	206294	798329
32	South	38	366	328			11.0031	158.09	317	1218.30218403706	158.089996337891	1915.09497070312	6977.96	173111	592370
33	South	104	155	51			9.50151	393.8	1	799.0722987408	372.135009765625	1044.46496582031	14265.8	360418	1.32367e+06
34	South	49	0	-49			14.3979	135.12	340	826.211372103657	135.119995117188	1387.60998535156	21478.7	439314	1.51248e+06
35	South	0	57	57			11.1358	89.92	301	1133.29717696702	87.5500030517578	1795.22497558594	6497.61	97353.7	347103
